# Supplementary material for: High thermal conductivity thermoplastic polyurethane/boron nitride/liquid metal composites: the role of the liquid bridge at the filler/filler interface
Source: Royal Society of Chemistry journal article supplement (doi:10.1039/d1ma00637a), 2021-01-01
Supplement: d1ma00637a1.pdf [file d1ma00637a1.pdf]

**High thermal conductive thermoplastic polyurethane/boron nitride/liquid metal  
composites: role of liquid bridge at the filler/filler interface**

Zemin Ji,<sup>a</sup> Wenyi Liu,<sup>a</sup> Chenguang Ouyang<sup>a</sup> and Yanbao Li <sup>\*a</sup>

<sup>a</sup>College of Material Science and Engineering, Nanjing Tech University, Nanjing 211816, PR China.  
Email: ybli@njtech.edu.cn, lyanbao@163.com

## Experimental

**TPU/BN composites** The thermoplastic polyurethane (TPU) solution (25 vol%) was prepared by dissolving TPU particles in N, N-dimethylformamide (DMF). Then boron nitride platelets (BN, 40 vol%) were added to the TPU solution. After stirring for 1 h, the TPU/BN suspension was poured into a mould (6 cm×6 cm× 4 mm). TPU/BN composites were obtained after dried in a vacuum oven at 60 °C for 30 h.

**TPU/BN/LM composites prepared by hand grinding** BN platelets and liquid metal (LM, a volume ratio of 3:1) were mixed by hand grinding for 30 min. BN/LM hybrid fillers were obtained. The TPU solution (25 vol%) was prepared by dissolving TPU particles in DMF. Then BN/LM hybrid fillers were added to the TPU solution. After stirring for 1 h, the TPU/BN/LM suspension was poured into a mould (6 cm×6 cm× 4 mm). TPU/BN/LM composites prepared by hand grinding were obtained after dried in a vacuum oven at 60 °C for 30 h.

**TPU/BN/LM composites prepared by sonication mixing** LM were sonicated in DMF for 30 minutes. Then TPU particles and BN platelets were added to the LM/DMF suspension. After stirring for 1 h, the TPU/BN/LM suspension was poured into a mould (6 cm×6 cm× 4 mm). TPU/BN/LM composites prepared by sonication were obtained after dried in a vacuum oven at 60 °C for 30 h.

**Contact angle tests** Contact angle between LM droplets and BN film were tested through a JC2000CS contact-angle meter (Shanghai Zhongchen digital technic apparatus co., Ltd) equipped with a charge coupled device (CCD) camera. The BN film was prepared by cold-pressing BN platelets under 10MPa. The contact angle was measured through shape analysis of images recorded by the CCD camera. LM droplets were dropped onto the BN film and rubbed on the BN film, respectively.

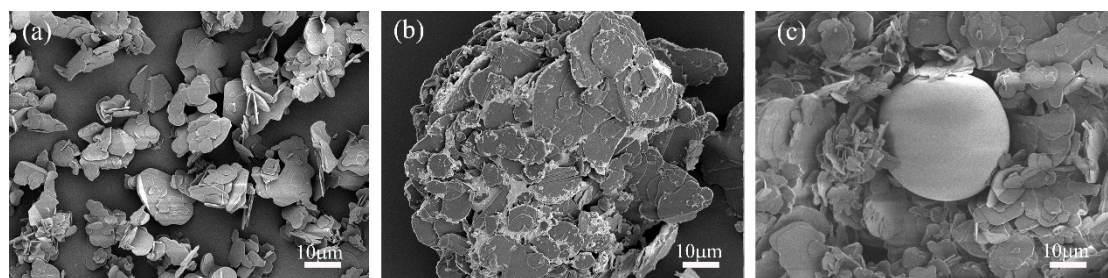

Fig. S1 SEM images of (a) BN platelets, and BN/LM hybrid fillers with a BN/LM ratio of 30/10 prepared by (b) hand grinding and (c) sonication mixing, respectively.

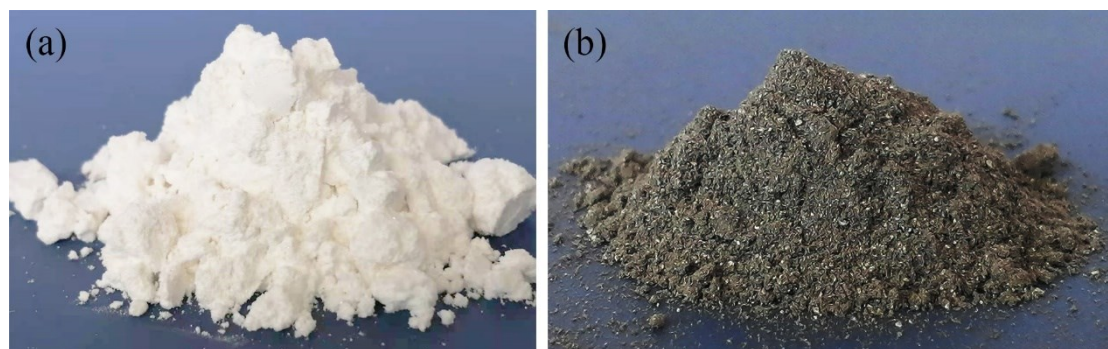

Fig. S2 Digital images of (a) BN powders and (b) BN/LM hybrid filler with the BN/LM ratio of

3:1.

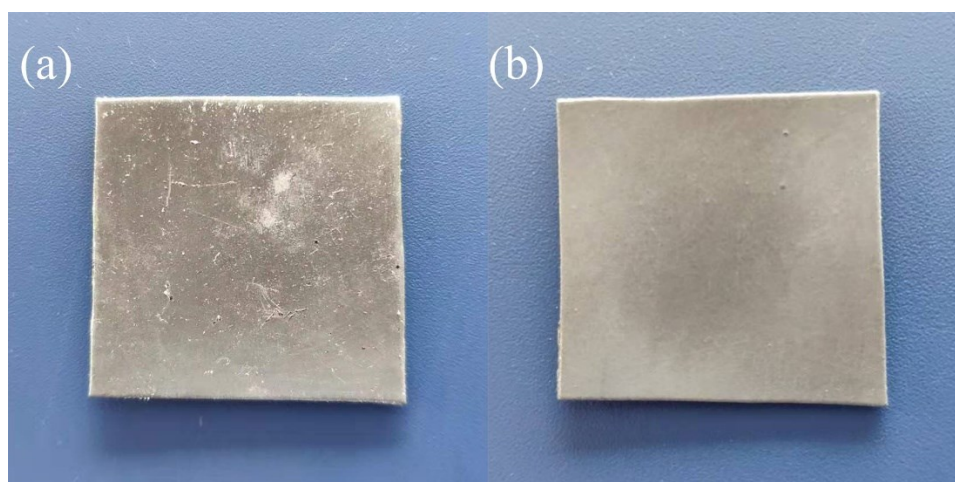

Fig. S3 Digital images of (a) TPU/LM composites and (b) TPU/BN/LM composites.

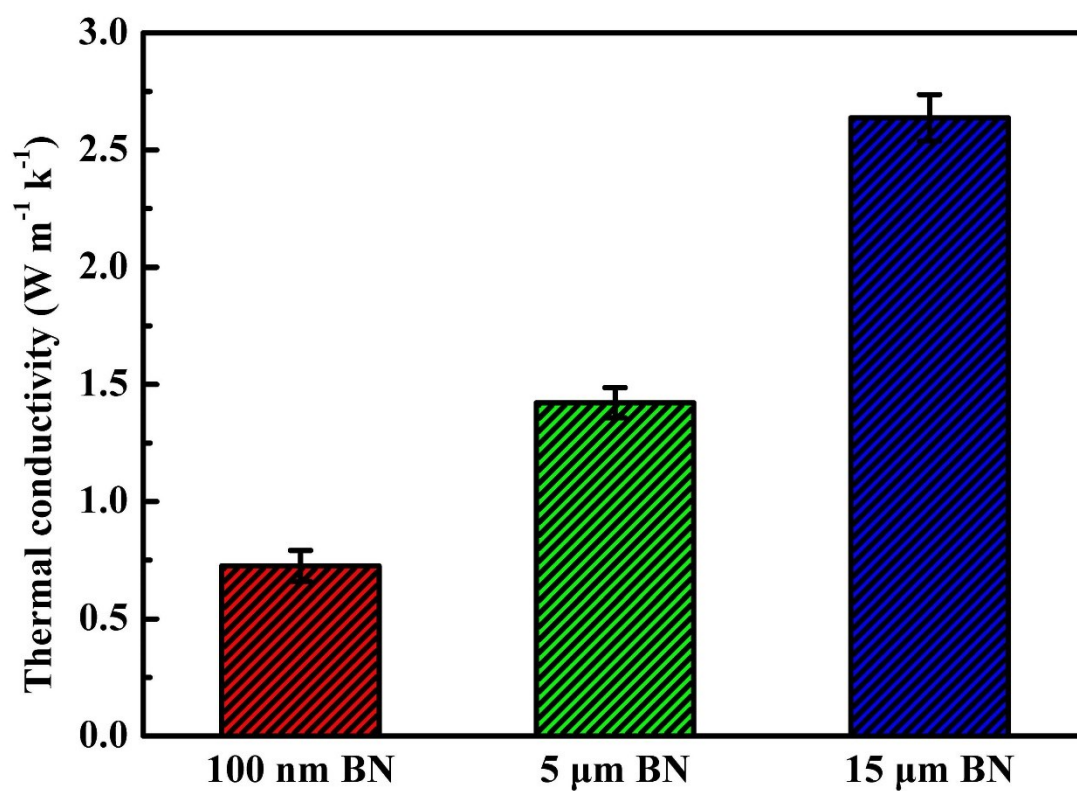

Fig.S4 Thermal conductivity (TC) of TPU/BN/LM composites containing different BN sizes with 40 vol% BN/LM at a BN/LM ratio of 30/10.

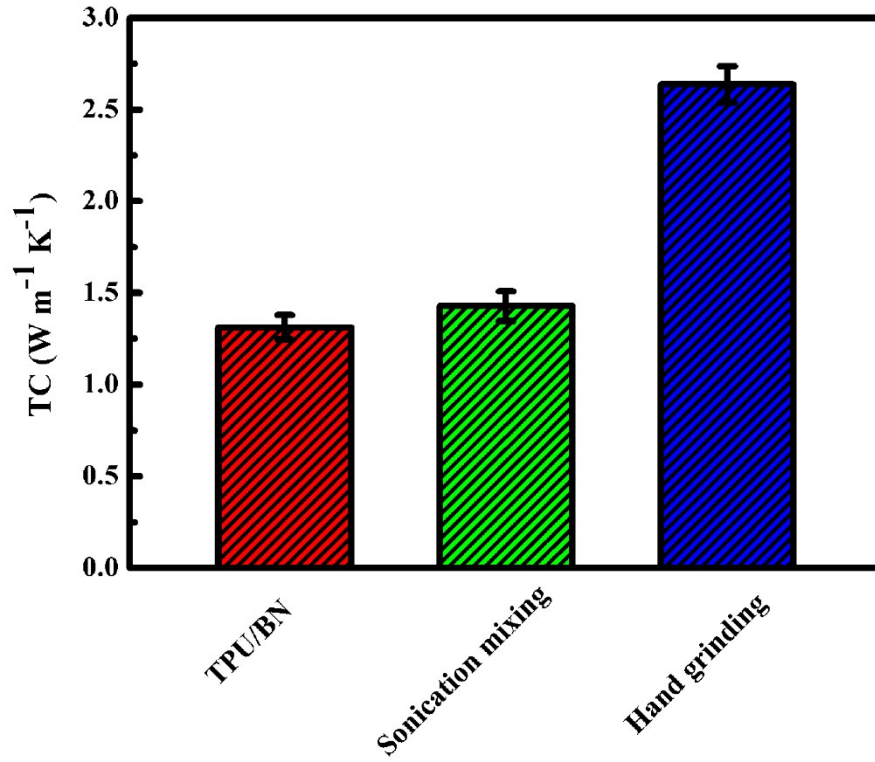

Fig. S5 Thermal conductivity of TPU/BN, TPU/BN/LM composites containing 40 vol% heat filler with a BN/LM ratio of 30/10 prepared by sonication mixing, TPU/BN/LM composites prepared by hand grinding.

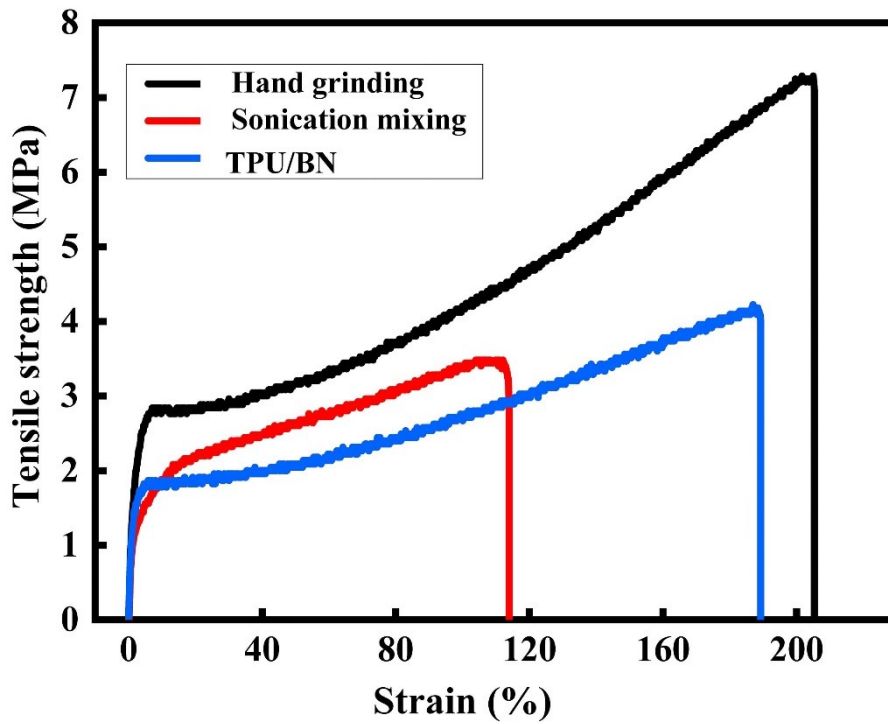

Fig. S6 Stress-strain curves of the TPU/BN composite containing 40 vol% BN and TPU/BN/LM composites containing 40 vol% hybrid filler with a BN/LM ratio of 30/10 prepared by different methods.

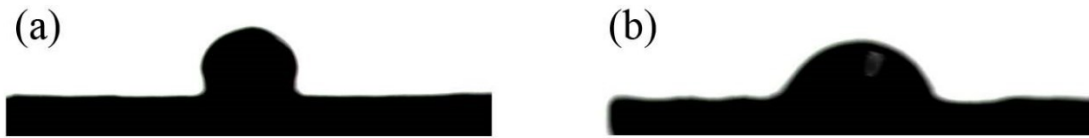

Fig. S7 Contact angle of LM and BN films. (a) LM was dropped on the BN film directly. (b) LM was rubbed on the BN film.

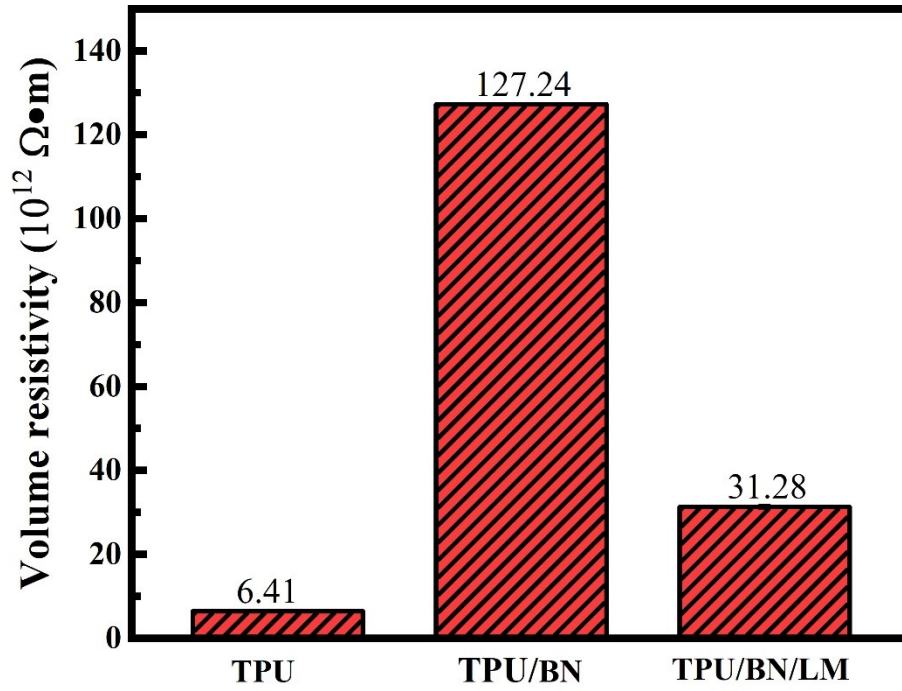

Fig. S8 Volume resistivity of TPU, TPU/BN containing 40 vol% BN and TPU/BN/LM containing 40 vol BN/LM with a BN/LM ratio of 30:10

Table S1 TC of the reported BN based polymer composites

| Matrix | Filler | Filler content | TC<br>(Wm <sup>-1</sup> K <sup>-1</sup> ) | Method       | Morphology of<br>the filler | Reference |
|--------|--------|----------------|-------------------------------------------|--------------|-----------------------------|-----------|
| PA6    | BN     | 40 vol%        | 5.70 <sup>//</sup>                        | Injection    | Orientation                 | S1        |
| PA6    | BN/AlN | 50 vol%        | 1.04                                      | Hot-pressing | -                           | S2        |
| Epoxy  | BN     | 40 vol%        | 1.98                                      | Impregnation | 3D Network                  | S3        |
| PC     | BN     | 40 wt%         | 1.35                                      | Hot-pressing | Random                      | S4        |
| PPS    | BN     | 40 vol%        | 4.15                                      | Hot-pressing | 3D segregation              | S5        |
| PP     | BN     | 40 vol%        | 2.1                                       | Hot-pressing | -                           | S6        |
| PPS    | BN     | 60 wt%%        | 2.64                                      | Hot-pressing | -                           | S7        |
| SiR    | BN     | 40 vol%        | 1.48                                      | -            | Random                      | S8        |
| PU     | BN     | 40 wt%         | 10 <sup>//</sup>                          | Hot-pressing | 3D Network                  | S9        |
| PU     | BN     | 40 wt%         | 5.2 <sup>//</sup>                         | Hot-pressing | High orientation            | S10       |
| PU     | BN     | 50 wt%         | 3.06                                      | Hot-pressing | Orientation                 | S11       |
| TPU    | BN     | 40 wt%         | 2.56 <sup>//</sup> , 0.91 <sup>⊥</sup>    | 3D print     | Orientation                 | S12       |
| PU     | BN     | 45 wt%         | 2.06                                      | Casting      | -                           | S13       |
| PU     | BN     | 35 wt%         | 1.78                                      | -            | -                           | S14       |
| PU     | BN     | 30 wt%         | 0.72                                      | Hot-pressing | Orientation                 | S15       |
| TPU    | BN/LM  | 40 vol%        | 2.64                                      | Casting      | Random                      | Our work  |

Note: PA6: polyamide 6; PC: polycarbonate; PPS: Polyphenylene sulfide; PP: polypropylene; PU: polyurethane; TPU: thermoplastic polyurethane; BN: boron nitride; AlN: aluminium nitride; LM: liquid metal; SiR: Silicone Rubber; <sup>//</sup> and <sup>⊥</sup> denote the in-plane and out-of-plane thermal conductivity of the composites, respectively.

- S1. L. Wang, L. C. Zhang, A. Fischer, Y. H. Zhong, D. Drummer and W. Wu, *J. Polym. Eng.*, 2018, **38**, 767.
- S2. G. Yildiz and M. Akkoyun, *J. Appl. Polym. Sci.*, 2021, **138**.
- S3. X. Y. Leng, C. Xiao, L. Chen, Z. Su, K. Zheng, X. Zhang and X. Y. Tian, *High Perform. Polym.*, 2019, **31**, 350.
- S4. S. T. Zhou, Y. Shi, Y. Bai, M. Liang and H. W. Zou, *Polym. Compos.*, 2020, **41**, 5418-5427.
- S5. Y. Jiang, Y. J. Liu, P. Min and G. X. Sui, *Compos. Sci. Technol.*, 2017, **144**, 63.
- S6. S. Takahashi, Y. Imai, A. Kan, Y. Hotta and H. Ogawa, *J. Alloys Compd.*, 2014, **615**, 141.
- S7. J. W. Gu, Y. Q. Guo, X. T. Yang, C. B. Liang, W. C. Geng, L. Tang, N. Li and Q. Y. Zhang, *Compos. Part A Appl. Sci. Manuf.*, 2017, **95**, 267.
- S8. W. Y. Zhou, S. H. Qi, H. Z. Zhao and N. L. Liu, *Polym. Compos.*, 2007, **28**, 23.
- S9. H. J. Hong, S. M. Kwan, D. S. Lee, S. M. Kim, Y. H. Kim, J. S. Lim, J. Y. Hwang and H. S. Jeong, *Compos. Sci. Technol.*, 2017, **152**, 94.
- S10. C. P. Yu, W. B. Gong, W. Tian, Q. C. Zhang, Y. C. Xu, Z. Y. Lin, M. Hu, X. D. Fan and Y. G. Yao, *Compos. Sci. Technol.*, 2018, **160**, 199.
- S11. T. Fei, Y. B. Li, B. C. Liu and C. B. Xia, *High Perform. Polym.*, 2020, **32**, 324.
- S12. J. Liu, W. Li, Y. Guo, H. Zhang and Z. Zhang, *Compos. Part A Appl. Sci. Manuf.*, 2019, **120**, 140.

- S13. A. Bashir, M. Maqbool, R. C. Lv, A. Usman, H. C. Guo, W. Aftab, H. Y. Niu, M. J. Liu and S. L. Bai, *Compos. Part B Eng.*, 2021, **218**, 108871.
- S14. G. Christensen, D. Lou, H. P. Hong and G. P. Peterson, *Thermochim. Acta*, 2021, **700**, 178927.
- S15. S. Ryu, H. Oh and J. Kim, *Mater. Chem. Phys.*, 2019, **223**, 607.
